# Supplementary material for: Multi-interfacial charge polarization for enhancing the hydrogen evolution reaction
Source: Royal Society of Chemistry journal article supplement (doi:10.1039/d3cy00323j), 2023-01-01
Supplement: d3cy00323j1.pdf [file d3cy00323j1.pdf]

## Electronic Supplementary Information (ESI)

### Multi-interfacial Charge Polarization for Enhancing Hydrogen Evolution Reaction

*Di Zhao, †,\*<sup>a</sup> Mengyun Hou, †,\*<sup>a</sup> Wuyi Feng,<sup>a</sup> Pengyu Song,<sup>a</sup> Kaian Sun,<sup>b</sup> Lirong Zheng,<sup>c</sup> Shoujie Liu,<sup>b</sup> Jiatao Zhang,\*<sup>a</sup> Minhua Cao,\*<sup>a</sup> Chen Chen\*<sup>b</sup>*

*<sup>a</sup>Key Laboratory of Cluster Science, Ministry of Education of China, Beijing Key Laboratory of Photoelectronic/Electrophotonic Conversion Materials, School of Chemistry and Chemical Engineering, Beijing Institute of Technology, Beijing 100081, China*

*<sup>b</sup>Department of Chemistry, Tsinghua University, Beijing 100084 (China)*

*<sup>c</sup>Beijing Synchrotron Radiation Facility, Institute of High Energy Physics, Chinese Academy of Sciences, Beijing 100049, China*

† These authors contributed equally to this work.

## Experimental Section

### Preparation of MoP/ufMoS<sub>2</sub>@NC NSs.

All chemicals used were analytical grade without further purification. Typically, the MoP/ufMoS<sub>2</sub>@NC NSs were synthesized as follows. First, 0.143 mmol of ammonium molybdate tetrahydrate [(NH<sub>4</sub>)<sub>6</sub>Mo<sub>7</sub>O<sub>24</sub>·4H<sub>2</sub>O], 1 mmol (NH<sub>4</sub>)<sub>2</sub>HPO<sub>4</sub> and 1.5 mmol thiourea were dispersed in 15 mL of deionized water to form transparent solution under vigorous stirring. Then, 1.0 g of F127 was added into the mixture solution under vigorous stirring. Subsequently, the mixture was subjected to freeze-drying for 24 h to yield a precursor. Finally, the typical sample MoP/ufMoS<sub>2</sub>@NC can be obtained by calcining the precursor at 750 °C for 3 h in H<sub>2</sub>/Ar atmosphere. In order to investigate the role of the constructed interfaces in electrochemical HER, control samples were prepared according to Table S1. The obtained products were denoted as sample MoP/ufMoS<sub>2</sub>@NC-x, where x represented the addition amount (mmol) of thiourea. In addition, the control samples of bare MoP (MoP), bare MoS<sub>2</sub> (MoS<sub>2</sub>), the hybrid of MoP and MoS<sub>2</sub> (MoP/MoS<sub>2</sub>) without carbon coating, and the composite comprising of MoP/MoS<sub>2</sub> nanoparticles and carbon (MoP/ufMoS<sub>2</sub>@NC-phy) were also synthesized by physically mixing according to Table S1.

### Characterizations.

Powder XRD datum were acquired on a D8 Advance (Super speed) XRD diffractometer (Bruker). The general size and morphology of the products were characterized by a field-emission scanning electron microscope (SEM, Hitachi S-4800). Transmission electron microscopy (TEM) and high-resolution transmission electron microscopy (HRTEM) were carried on a H-8100 transmission electron microscope operating at a 200 kV accelerating voltage. The X-ray photoelectron spectroscopy (XPS) experiments were tested on the ESCALAB 250 spectrometer (Perkin-Elmer). The Brunauer-Emmett-Teller (BET) specific surface areas of typical products were performed at 77 K in a Belsorp-max surface area detecting instrument.

### Electrochemical Measurements for hydrogen evolution reaction.

All the electrochemical measurements were conducted using a CHI760E potentiostat (CH Instruments, China) in a typical three-electrode setup with an hydrogen-saturated electrolyte solution of 0.5 M H<sub>2</sub>SO<sub>4</sub> (pH = 0.3): a graphite rod as the counter electrode, a saturated calomel electrode (SCE) as the reference electrode and the working electrode was a glassy carbon (3 mm in diameter) supporting the measured materials. Catalyst ink was prepared by dispersing 2

mg of catalyst into 450  $\mu\text{L}$  of ethanol solvent containing 50  $\mu\text{L}$  of 5 wt% Nafion and sonicated for 30 min. Then 10  $\mu\text{L}$  of the catalyst ink (containing 40  $\mu\text{g}$  of catalyst) was loaded onto a glassy carbon with a loading of ca. 0.57  $\text{mg cm}^{-2}$ ) after air-drying. For comparison, the commercial 20 wt % Pt/C was supported on the glassy carbon with the same loading. In all measurements, the SCE reference electrode was calibrated with respect to reversible hydrogen electrode (RHE). LSV was conducted in 0.5 M  $\text{H}_2\text{SO}_4$  and 1 M KOH solutions with a scan rate of 10  $\text{mV s}^{-1}$ . The time dependency of catalytic currents during electrolysis for the catalyst was tested in 0.5 M  $\text{H}_2\text{SO}_4$  and 1 M KOH at 10  $\text{mV cm}^{-2}$ . Electrochemical impedance spectroscopy (EIS) measurements were also carried out in the frequency range of 100 kHz–0.01 Hz. The potentials in the final graphs were converted to the potentials versus the reversible hydrogen electrode (RHE) according to the following calculation:  $E(\text{RHE}) = E(\text{SCE}) + 0.241 + 0.0592 \text{ pH}$ . The effective electrochemically active surface area (ECSA) was measured by cyclic voltammetry (CV) using the same working electrodes at a potential window of 0.29-0.383 (RHE). CV curves were obtained at different scan rates of 10, 20, 30, 40, 50, 60, 70, 80, 120, 160  $\text{mV s}^{-1}$ . After plotting charging current density differences ( $\Delta j = j_a - j_c$  at the overpotential of 340 mV) versus the scan rates, the slope, twice of the double-layer capacitance  $C_{dl}$ , is used to represent ECSA. We used phosphate acid ( $\text{H}_3\text{PO}_4$ : 0.5 M and 1 M  $\text{H}_3\text{PO}_4$  solutions) to block the possible py-N ctive sites.

### **XAFS measurements.**

The X-ray absorption fine structure spectra (Mo K-edge) were collected at 1W1B station in Beijing Synchrotron Radiation Facility (BSRF). The storage rings of BSRF was operated at 2.5 GeV with an average current of 250 mA. Using Si(111) double-crystal monochromator, the data collection were carried out in transmission/fluorescence mode using ionization chamber. All spectra were collected in ambient conditions.

### **XAFS Analysis and Results.**

The acquired EXAFS data were processed according to<sup>[1]</sup> the standard procedures using the ATHENA module implemented in the IFEFFIT software packages<sup>[1-2]</sup>. The  $k^3$ -weighted EXAFS spectra were obtained by subtracting the post-edge background from the overall absorption and then normalizing with respect to the edge-jump step<sup>[3]</sup>. Subsequently,  $k^3$ -weighted  $\chi(k)$  data of Fe K-edge were Fourier transformed to real (R) space using a hanning windows ( $d_k=1.0 \text{ \AA}^{-1}$ ) to separate the EXAFS contributions from different coordination shells. To obtain the quantitative structural parameters around central atoms, least-squares curve parameter fitting was performed using the ARTEMIS module of IFEFFIT software packages.

### Computational details.

A series of density functional theory (DFT) calculations were all done with the Vienna Ab initio Simulation Package (VASP) [4]. The electron-ion interaction was described using the projector augmented wave (PAW)[5], and the kinetic energy cutoff for plane wave expansions was set to 450 eV. The electron exchange and correlation energies were treated within a generalized gradient approximation (GGA) in the Perdew-Burke-Ernzerhof (PBE) exchange-correlation[6]. A DFT-D3 scheme of dispersion correction was used to describe the van der Waals (vdW) interactions in molecule adsorption[7]. The Brillouin zone was sampled using the Monkhorst-Pack  $3 \times 3 \times 1$  sampling[8] and the convergence criteria were  $1 \times 10^{-6}$  eV and  $1 \times 10^{-7}$  eV energy differences for solving for the electronic wave function in structure optimization and vibrational frequency calculations, respectively, and force convergence criterion of  $-0.02$  eV  $\text{\AA}^{-1}$ . To avoid the interactions between two adjacent periodic images, the vacuum thickness was set to be 15  $\text{\AA}$ . The electron smearing width of  $\sigma = 0.05$  eV was employed according to the Methfessel-Paxton technique. The free energy correction was obtained similarly by including the zero-point energy (ZPE) and entropic contributions from vibrational degrees of freedom calculated with the substrate fixed, and the value gained by using Vaspkit.1.2.5[9].

### The construction of the model is described as follows:

According to our previous work[10], the thermodynamically stable plane (001) in MoP and Mo atoms are exposed on the surface. It can be seen from the TEM images that the plane (100) of MoP forms a heterojunction with the plane (002) of MoS<sub>2</sub>.

MoP: A  $2 \times 3$  supercell consisting of 24 atoms from a MoP conventional cell of the lattice parameters of  $a=5.62$   $\text{\AA}$ ,  $b=3.24$   $\text{\AA}$ ,  $c=3.20$   $\text{\AA}$  and  $\alpha=\beta=90^\circ$ ,  $\gamma=90^\circ$  was used firstly, then cleaving surface of plane (001) and the fractional thickness set to 2.0, adding vacuum thickness to build vacuum slab crystal of the lattice parameters of  $a=11.24$   $\text{\AA}$ ,  $b=9.73$   $\text{\AA}$ ,  $c=25.00$   $\text{\AA}$  and  $\alpha=\beta=\gamma=90^\circ$ .

MoP\_NC: A  $3 \times 3$  supercell consisting of 36 atoms from a MoP conventional cell of the lattice parameters of  $a=5.62$   $\text{\AA}$ ,  $b=3.24$   $\text{\AA}$ ,  $c=3.20$   $\text{\AA}$  and  $\alpha=\beta=90^\circ$ ,  $\gamma=90^\circ$  was used firstly, then cleaving surface of plane (001) and the fractional thickness set to 2.0 to get the MoP-layer.

A  $4 \times 4$  supercell consisting of 64 carbon atoms from a graphene conventional cell of the lattice parameters of  $a=4.26$   $\text{\AA}$ ,  $b=2.46$   $\text{\AA}$  and  $\alpha=\beta=90^\circ$ ,  $\gamma=90^\circ$  was used firstly, then deleted two connected carbon atoms for formed a defect, and C atoms were substituted by four N atoms in the innermost layer at the defect. Next, cleaving surface of plane (001) and the fractional thickness set to 1.0 to get the graphene-layer.

And then the MoP-layer matched graphene-layer to each other to construct a heterojunction, with the distance of two layers is 2.5 Å and choosing the average lattice parameter to build the new slab crystal of  $a=16.95 \text{ Å}$ ,  $b=9.79 \text{ Å}$ ,  $c=25 \text{ Å}$  and  $\alpha=\beta=90^\circ$ ,  $\gamma=90^\circ$ . The lattice constant a mismatch degree are 0.53% of MoP-layer and 0.53% of graphene-layer.

MoPS\_NC: A MoP conventional cell of the lattice parameters of  $a=5.62 \text{ Å}$ ,  $b=3.24 \text{ Å}$ ,  $c=3.20 \text{ Å}$  and  $\alpha=\beta=90^\circ$ ,  $\gamma=90^\circ$  was used firstly, then cleaving surface of plane (100) and regulating the Mo-terminated of top and bottom surface with consisting of 5 atoms. Next a 5x1 super surface consisting of 25 atoms with the lengths  $u=16.22 \text{ Å}$ ,  $v=3.20 \text{ Å}$  was built as the MoP'-layer.

A MoS<sub>2</sub> conventional cell of the lattice parameters of  $a=5.48 \text{ Å}$ ,  $b=3.17 \text{ Å}$ ,  $c=18.41 \text{ Å}$  and  $\alpha=\beta=90^\circ$ ,  $\gamma=90^\circ$  was used firstly, then cleaving surface of plane (001) and regulating the S-terminated of top and bottom surface with consisting of 6 atoms. Next a 3x1 super surface consisting of 18 atoms with the lengths  $u=16.45 \text{ Å}$ ,  $v=3.17 \text{ Å}$  was built as the MoS<sub>2</sub>-layer.

And then the MoP'-layer matched graphene-layer to each other to construct a heterojunction, with the distance of two layers is 3.0 Å and choosing the average lattice parameter to build the new slab crystal of  $a=16.34 \text{ Å}$ ,  $b=3.18 \text{ Å}$ ,  $c=14.76 \text{ Å}$  and  $\alpha=\beta=90^\circ$ ,  $\gamma=90^\circ$  as MoPS. The lattice constant a mismatch degree are 0.74% of MoP'-layer and 0.67% of MoS<sub>2</sub>-layer.

Next, cleaving the surface of plane (0 1 0) of MoPS and the fractional thickness set to 2.0 to get the MoPS-layer with the lengths of  $u=14.76 \text{ Å}$ ,  $v=16.34 \text{ Å}$ .

A graphene conventional cell of the lattice parameters of  $a=2.46 \text{ Å}$ ,  $b=4.26 \text{ Å}$  and  $\alpha=\beta=90^\circ$ ,  $\gamma=90^\circ$  was used firstly, then cleaving surface of plane (001) with consisting of 4 atoms. Next a 6x4 super surface consisting of 96 atoms with the lengths  $u=14.76 \text{ Å}$ ,  $v=17.04 \text{ Å}$  was built, then deleted two connected carbon atoms for formed a defect, and C atoms were substituted by four N atoms in the innermost layer at the defect as graphene'-layer.

And then the MoPS-layer matched graphene'-layer to each other to construct a heterojunction, with the distance of two layers is 2.5 Å and choosing the average lattice parameter to build the new slab crystal of  $a=14.76 \text{ Å}$ ,  $b=16.69 \text{ Å}$ ,  $c=25.00 \text{ Å}$  and  $\alpha=\beta=90^\circ$ ,  $\gamma=90^\circ$  as MoPS\_NC. The lattice constant b mismatch degree are 2.14% of MoPS-layer and 2.05% of graphene'-layer.

The adsorption energy was calculated by subtracting the energies of the isolated adsorbate and the catalyst from the total energy of the adsorbed system:

$$E_b = E(\text{slab} + \text{adsorbate}) - E(\text{slab}) - E(\text{adsorbate})$$

The pathway by which the HER occurs under base condition are generally reported to proceed according to the following step:

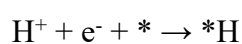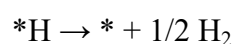

Where the \* refers to the catalytic, and the \*one refers to the species that adsorbed on the activity sites.

The kinetic energy barrier of the initial water dissociation step ( $\Delta G_{\text{H}_2\text{O}}$ ) is applied as an activity descriptor for HER under alkaline condition, which can be calculated as follows:

$$\Delta G_{\text{H}_2\text{O}} = G_{\text{TS}} - G_{\text{IS}}$$

where  $G_{\text{TS}}$  and  $G_{\text{IS}}$  are the free energy of the transient state and the initial state for water dissociation, respectively.

Neglect PV contribution to translation for adsorbed molecules, the free energy of every step was calculated according to the equation of  $G = E + H_{\text{cor}} - TS = E + G_{\text{cor}}$ , where  $E$  is the energy of every specie obtained from DFT calculations, and  $S$  are entropy, while  $T$  is 298.15 K. The  $H_{\text{cor}}$  and  $G_{\text{cor}}$  are the thermal correction to enthalpy and the thermal correction to Gibbs free energy, respectively. The  $G_{\text{cor}}$  of  $^*\text{H}$  and  $^*\text{H}_2\text{O}$  were taken from the frequency DFT calculation and got value by using Vaspkit.1.2.5.

The Gibbs free energy of the proton-electron pairs ( $\text{H}^+ + \text{e}^-$ ) related in the PECT progress<sup>[11]</sup>, whereas the fact that the proton-electron pairs is in equilibrium with gaseous  $\text{H}_2$  at 0 V versus standard hydrogen electrode ( $U = 0$ ,  $\text{pH} = 0$ , and pressure = 1 bar, and temperature = 298.15K):

$$\mu(\text{H}^+ + \text{e}^-) = 1/2 \mu(\text{H}_2(\text{g}))$$

According to Vaspkit.1.2.5, the internal energy of gas molecular gained from the formula:  $U(T) = \text{ZPE} + \Delta U(0-T)$ , the enthalpy of gas molecular gained from the formula:  $H(T) = U(T) + PV = \text{ZPE} + \Delta U(0-T) + PV$ , and the Gibbs free energy of gas molecular gained from the formula:  $G(T) = H(T) - TS = \text{ZPE} + \Delta U(0-T) + PV - TS = E_{\text{DFT}} + G_{\text{cor}}$ .

Where  $E_{\text{DFT}}$  is the energy of the free gas molecule obtained from DFT calculations,  $G_{\text{cor}}$  is the thermal correction to Gibbs free energy of the free gas molecule obtained from the frequency DFT calculation and got value by using Vaspkit.1.2.5, with the temperature of 298.15K, the pressure of  $\text{H}_2\text{O}$  and  $\text{H}_2$  were 0.035 atm and 1 atm, respectively, and all species input 1 as the value of spin multiplicity.

The d-band center<sup>[12]</sup> of the 4d orbitals of Mo obtained from their PDOS by using equation:

$$\varepsilon_d = \frac{\int_{-\infty}^{+\infty} \varepsilon f(\varepsilon) d\varepsilon}{\int_{-\infty}^{+\infty} f(\varepsilon) d\varepsilon}$$

where, the  $f(\varepsilon)$  is the PDOS of an energy level of  $\varepsilon$ .

The charge density difference was evaluated using the formula  $\Delta\rho = \rho(\text{Mo}/\text{substrate}) - \rho(\text{Mo}) - \rho(\text{substrate})$ , then analyzed by using the VESTA code<sup>[13]</sup>.

### Supporting Figure and Tables

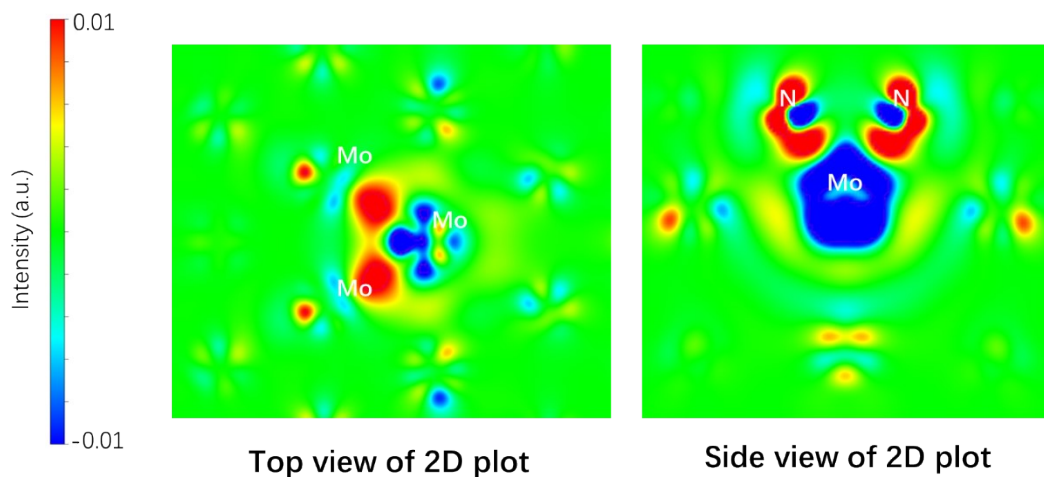

**Figure S1.** Multiple views of charge density differences of MoP@NC. The isosurface level set to  $0.005 \text{ e}\text{\AA}^{-3}$ , where charge depletion and accumulation were depicted by red and purple, respectively.

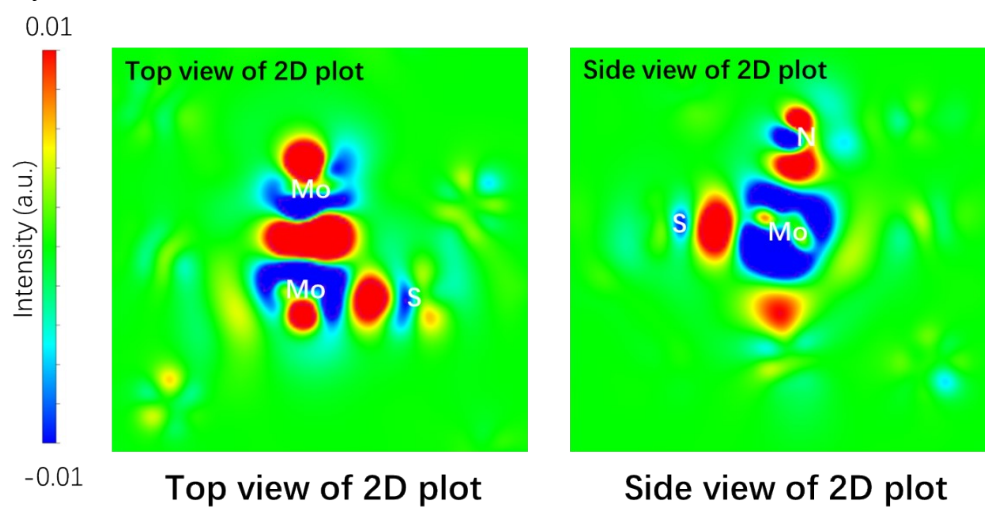

**Figure S2.** Multiple views of charge density differences of MoP/urfMoS<sub>2</sub>@NC. The isosurface level set to  $0.005 \text{ e}\text{\AA}^{-3}$ , where charge depletion and accumulation were depicted by red and purple, respectively.

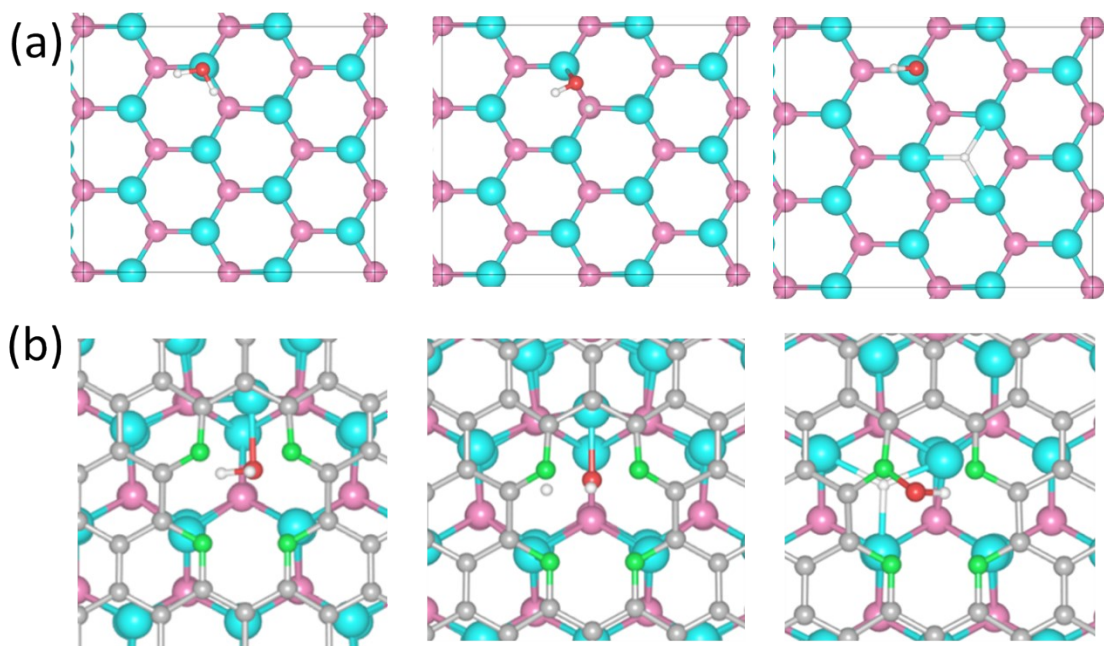

**Figure S3.** Diagrams of Volmer step with initial state (IS), transition state (TS) and final state (FS) of (a) MoP and (b) MoP@NC, respectively.

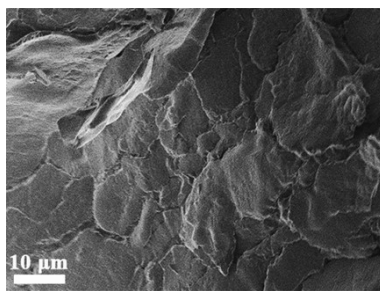

**Figure S4.** SEM image of as-synthesized precursor for pomegranate-like MoP/urfMoS<sub>2</sub>@NC.

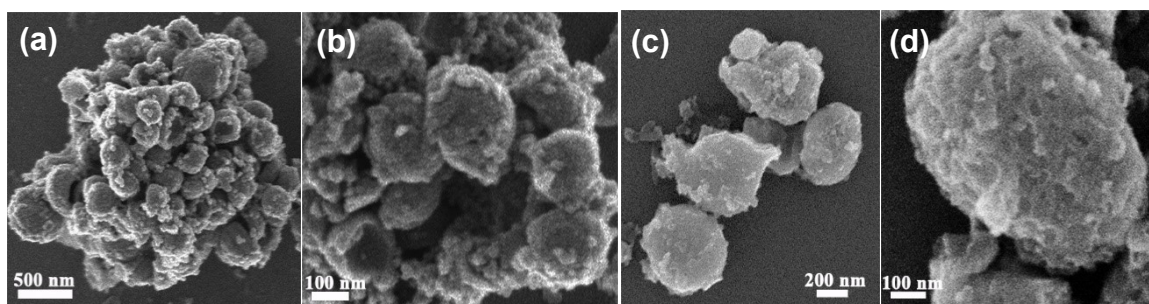

**Figure S5.** (a,b) Low- and (c,d) High-magnification SEM images of MoP/urfMoS<sub>2</sub>@NC.



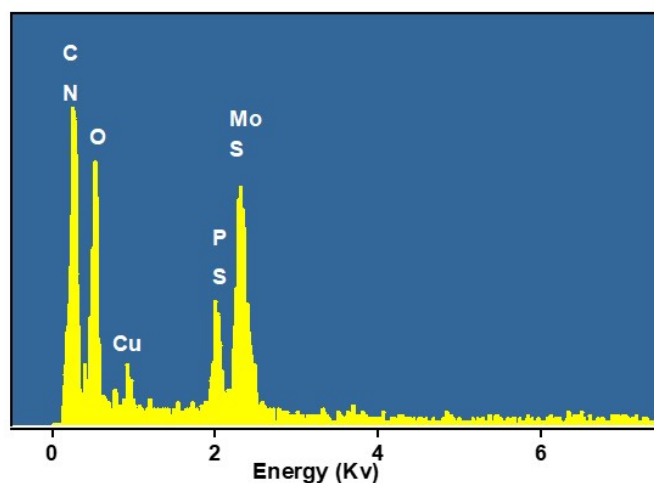

**Figure S6.** EDS recorded on an individual MoP/urfMoS<sub>2</sub>@NC.

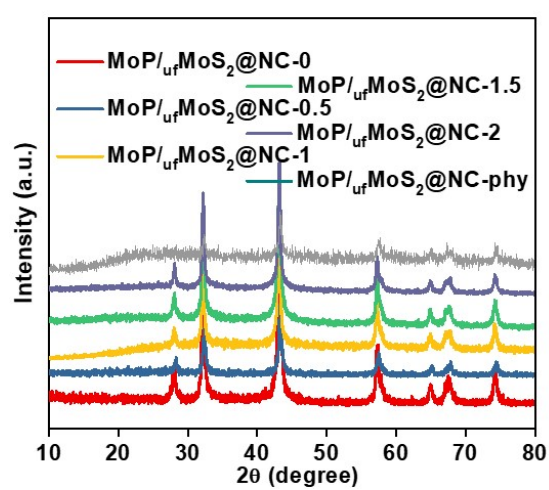

**Figure S7.** XRD patterns of the all control samples for MoP/urfMoS<sub>2</sub>@NC-X and MoP/urfMoS<sub>2</sub>@NC-phy.

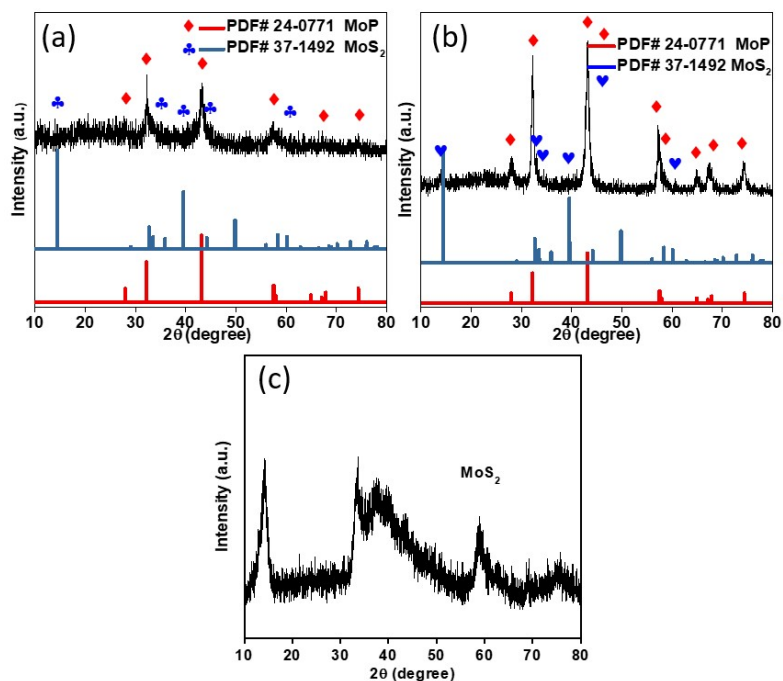

**Figure S8.** XRD patterns of the control samples for MoP/ufMoS<sub>2</sub>@NC-4, MoP/MoS<sub>2</sub> and MoS<sub>2</sub>.

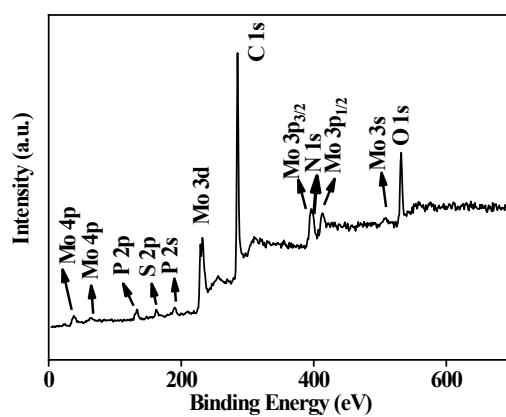

**Figure S9.** XPS survey spectrum of MoP/ufMoS<sub>2</sub>@NC.

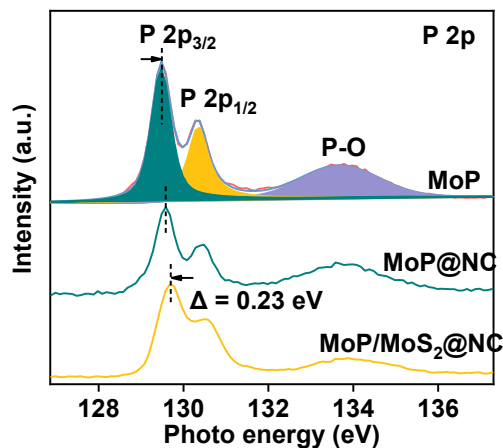

**Figure S10.** High-resolution P 2p XPS spectra of MoP/<sub>uf</sub>MoS<sub>2</sub>@NC, MoP@NC, and bulk MoP.

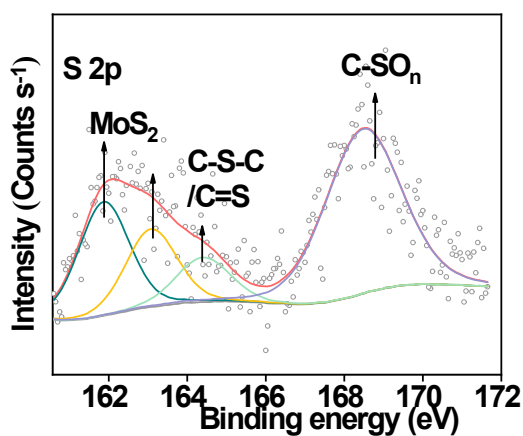

**Figure S11.** High-resolution S 2p XPS spectra of MoP/<sub>uf</sub>MoS<sub>2</sub>@NC. Figure S11 shows the S 2p spectrum. The main doublet located at binding energies of 161.9 and 163.3 eV, corresponds to the S 2p<sub>3/2</sub> and S 2p<sub>1/2</sub> lines of MoS<sub>2</sub>.<sup>[14]</sup> Another two peaks centered at 164.7 and 168.8 eV, indicating the presence of sulfur in two forms which are attributed to the sulfur binding in -C-S-/C=S- bonds and the oxidized sulfur (-C-SO<sub>n</sub>-C-).<sup>[15]</sup>

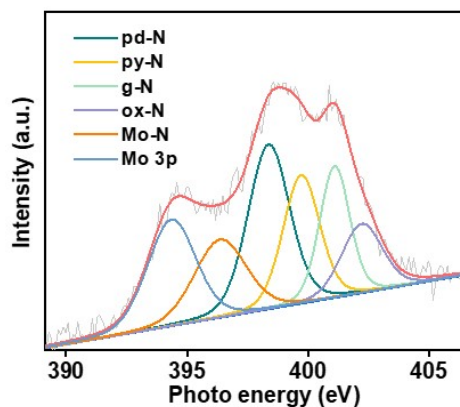

**Figure S12.** High-resolution N 1s XPS spectra of MoP/<sub>uf</sub>MoS<sub>2</sub>@NC. The N 1s XPS spectrum was deconvoluted into four peaks of pyridinic N (py-N), pyrrolic N (py-N), graphitic N (g-N) and oxidized nitrogen (ox-N) at the binding energies of around 398.4, 399.7, 401.1 eV and 402.2, respectively (Figure 3c).<sup>[16]</sup>

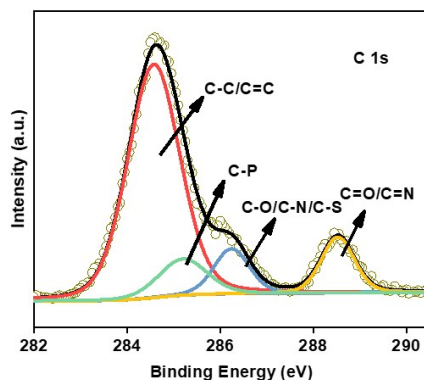

**Figure S13.** High-resolution C 1s XPS spectra of MoP/<sub>uf</sub>MoS<sub>2</sub>@NC. The deconvolution of C1s XPS spectra (Figure S11) yielded for major components, corresponding to C-C/C=C (284.7 eV), C-P (285.2 eV), C-N/C-O/C-S (286 eV) and C=O/C=N (288.6 eV).<sup>[17]</sup>

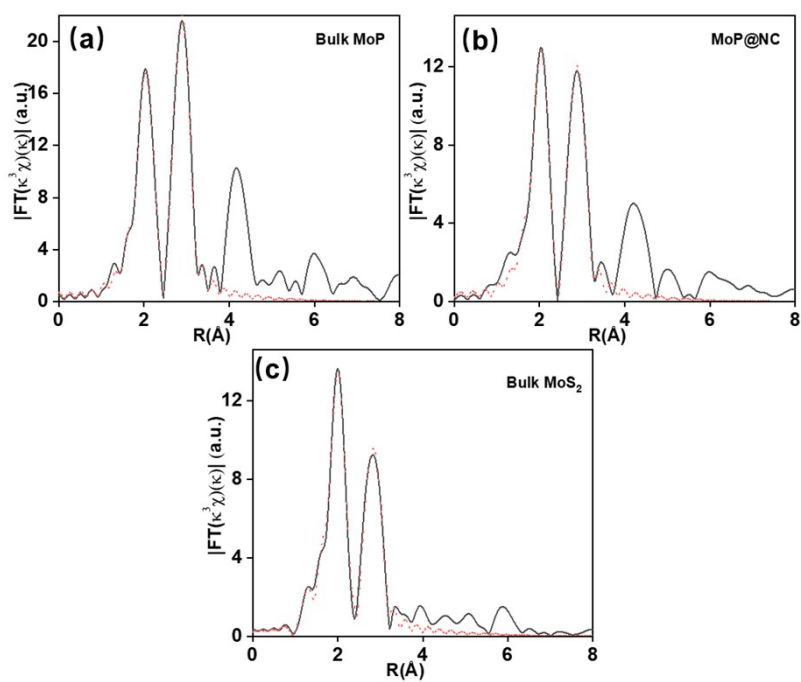

**Figure S14.** k The EXAFS fitting for MoP, MoS<sub>2</sub> and MoP@NC.

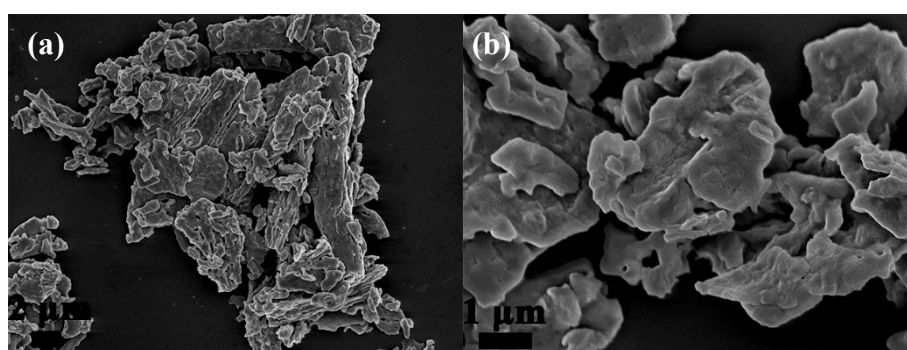

**Figure S15.** SEM images of MoP/<sub>uf</sub>MoS<sub>2</sub> NPs.

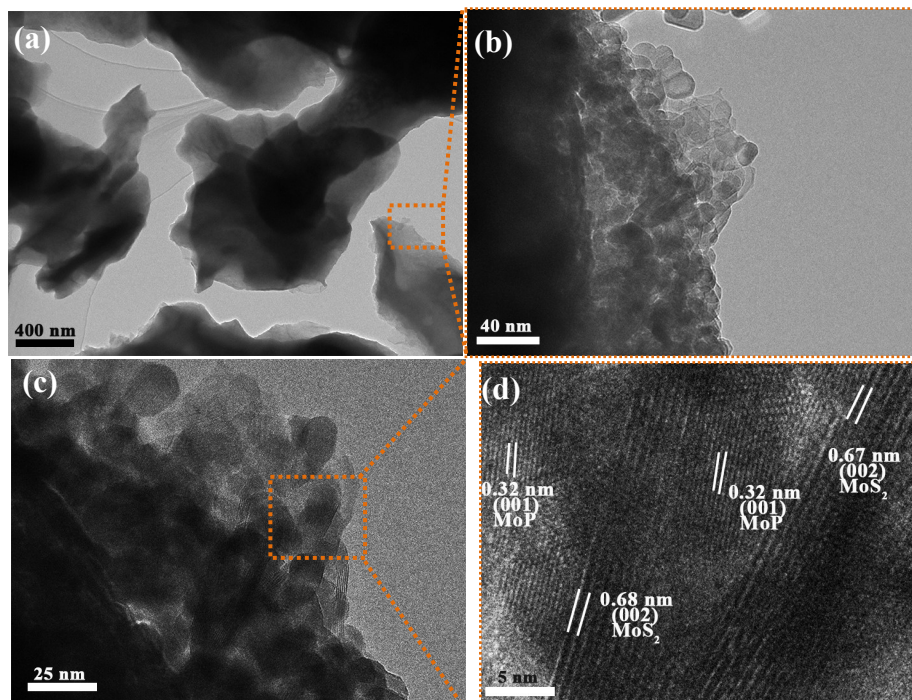

**Figure S16.** TEM images of MoP/ufMoS<sub>2</sub> NPs.

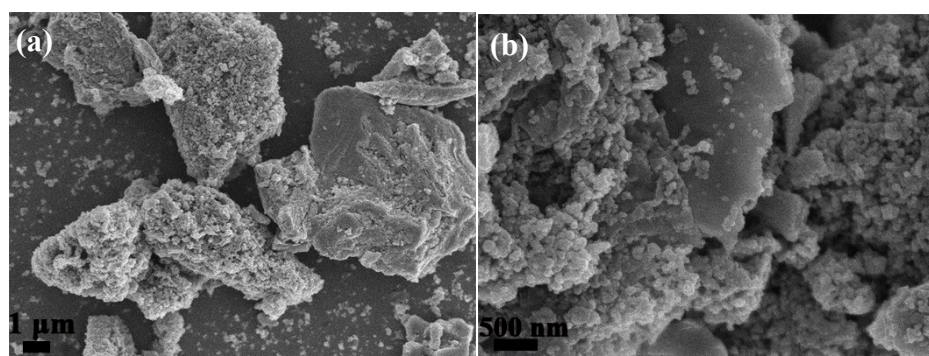

**Figure S17.** SEM images of MoP/ufMoS<sub>2</sub>@NC-phy.

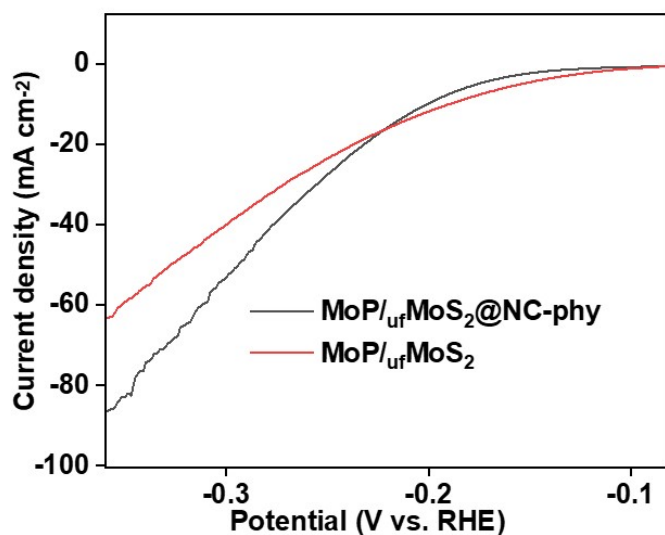

**Figure S18.** Polarization curves of MoP/ufMoS<sub>2</sub>@NC-phy and MoP/ufMoS<sub>2</sub> nanoparticles in 0.5 M H<sub>2</sub>SO<sub>4</sub> at a scan rate of 10 mV s<sup>-1</sup>.

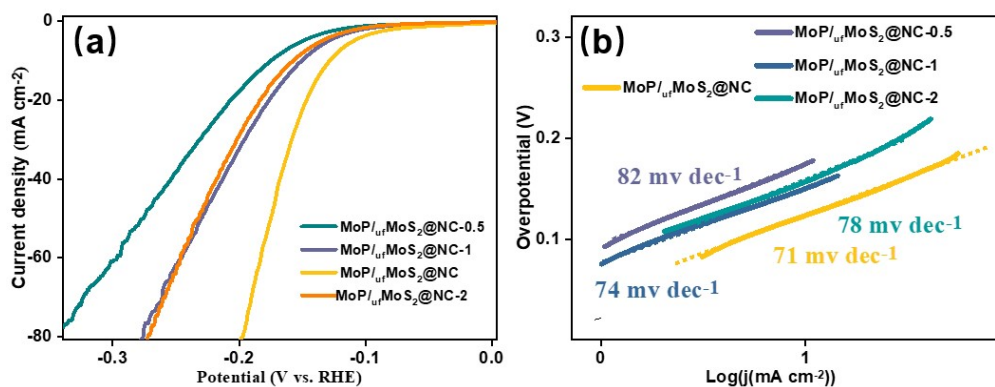

**Figure S19.** Polarization curves and their corresponding Tafel plots of MoP/ufMoS<sub>2</sub>@NC-x with different MoS<sub>2</sub> decorating in 0.5 M H<sub>2</sub>SO<sub>4</sub> at a scan rate of 10 mV s<sup>-1</sup>.

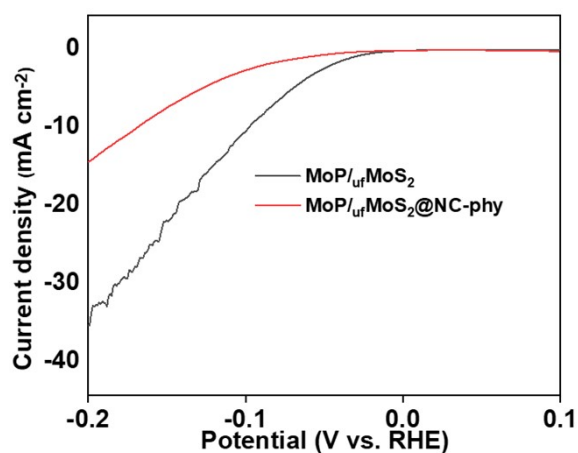

**Figure S20.** Polarization curves of MoP/ufMoS<sub>2</sub>@NC-phy and MoP/ufMoS<sub>2</sub> nanoparticles in 1 M KOH at a scan rate of 10 mV s<sup>-1</sup>.



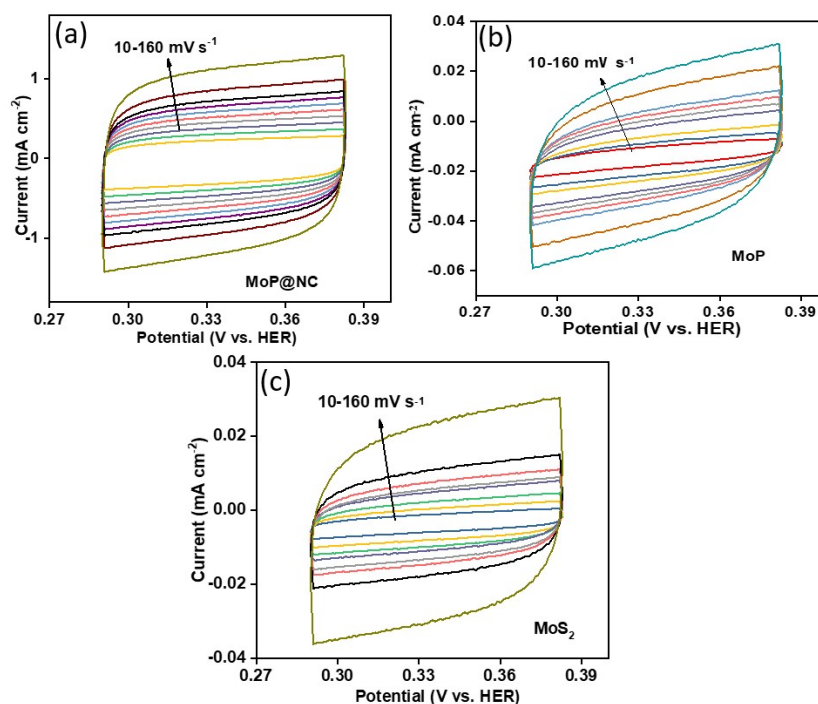

**Figure S21.** Cyclic voltammograms (CVs) of MoP@NC NSS, MoP and MoS<sub>2</sub> control samples where no Faradaic processes measured at different scan rates from 10 to 160 mV s<sup>-1</sup> in the potential range of 0.29-0.383 V.

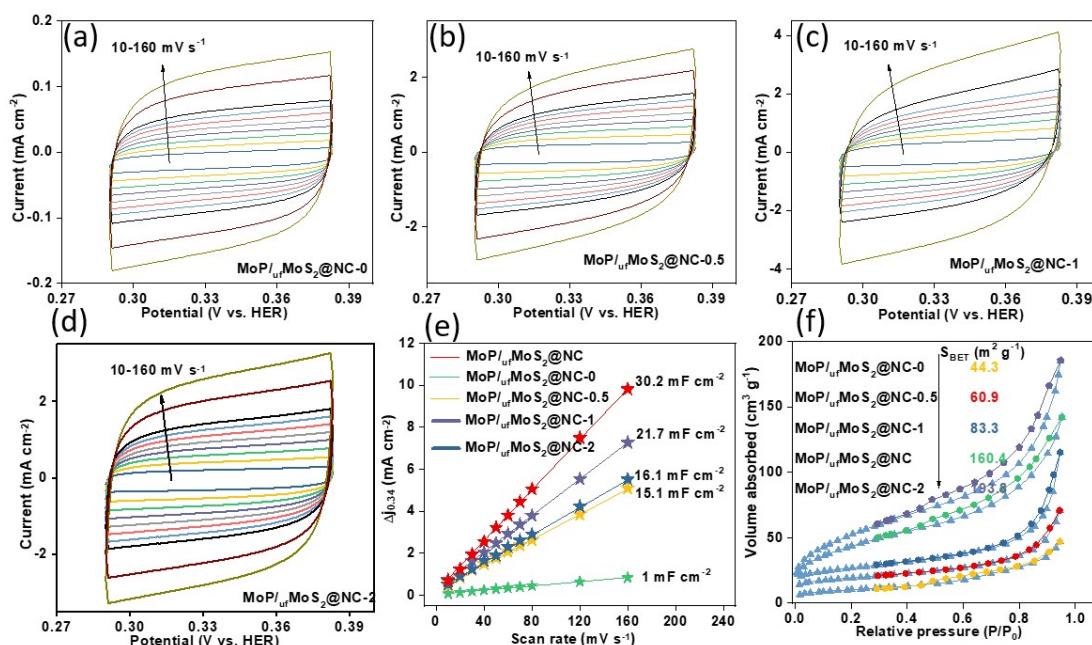

**Figure S22.** (a-d) Cyclic voltammograms (CVs) of MoP/urfMoS<sub>2</sub>@NC-X (x= 0, 0.5, 1 and 2) samples measured at different scan rates from 10 to 160 mV s<sup>-1</sup> in the potential range of 0.29-0.383 V. (e) Charging current density differences plotted against scan rates. The linear slope, equivalent to twice the double-layer capacitance, C<sub>dl</sub>, was used to represent the ECSA. (f) N<sub>2</sub> adsorption and desorption curves of all MoP/urfMoS<sub>2</sub>@NC-X samples and corresponding BET surface areas.



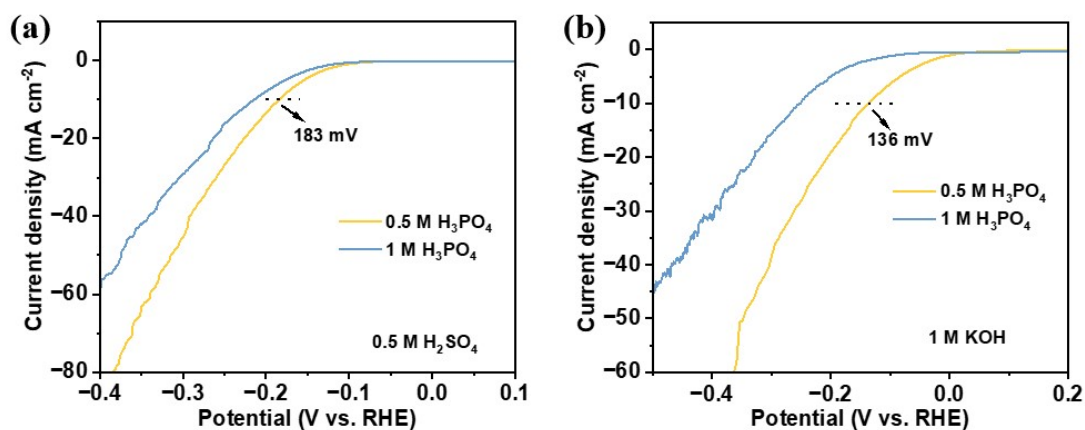

**Figure S23.** LSV curves of MoP/<sub>uf</sub>MoS<sub>2</sub>@NC (soaking in 0.5, 1 M H<sub>3</sub>PO<sub>4</sub> solutions) in 0.5 M H<sub>2</sub>SO<sub>4</sub> and 1 M KOH electrolyte.

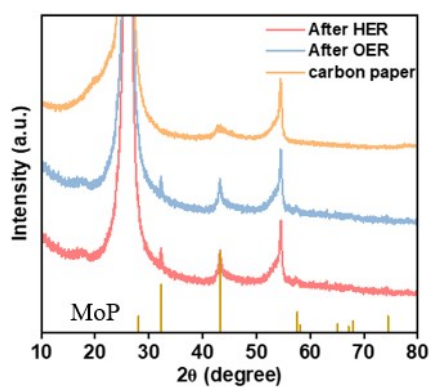

**Figure S24.** XRD characterization of MoP/<sub>uf</sub>MoS<sub>2</sub>@NC catalyst after a long time stability testing.

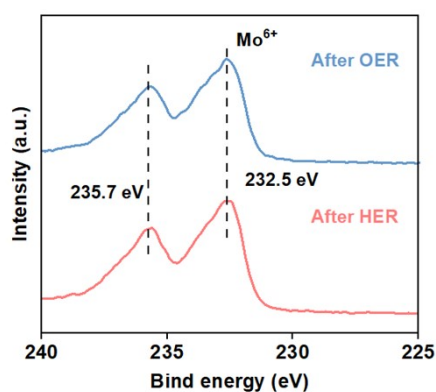

**Figure S25.** XPS spectra of Mo 3d for MoP/<sub>uf</sub>MoS<sub>2</sub>@NC before and after HER and OER stability test.

**Table S1.** Different reaction conditions for the synthesis of MoP/ufMoS<sub>2</sub>@NC and other control samples.

| Samples                         | (NH <sub>4</sub> ) <sub>6</sub> Mo <sub>7</sub> O <sub>24</sub> ·4H <sub>2</sub> O<br>[mmol] | (NH <sub>4</sub> ) <sub>2</sub> HPO <sub>4</sub><br>[mmol] | F127<br>[g] | Thiourea<br>[mmol] | Urea<br>[mmol] |
|---------------------------------|----------------------------------------------------------------------------------------------|------------------------------------------------------------|-------------|--------------------|----------------|
| MoP/ufMoS <sub>2</sub> @NC      | 0.143                                                                                        | 1                                                          | 1           | 1.5                | -              |
| MoP@NC                          | 0.143                                                                                        | 1                                                          | 1           | -                  | 1.5            |
| MoP                             | 0.143                                                                                        | 1                                                          | 0           | 0                  | -              |
| MoS <sub>2</sub>                | 0.143                                                                                        | 0                                                          | 0           | 1.5                | -              |
| MoP/ufMoS <sub>2</sub> @NC-0    | 0.143                                                                                        | 1                                                          | 1           | 0                  | -              |
| MoP/ufMoS <sub>2</sub> @NC-0.5  | 0.143                                                                                        | 1                                                          | 1           | 0.5                | -              |
| MoP/ufMoS <sub>2</sub> @NC-1    | 0.143                                                                                        | 1                                                          | 1           | 1                  | -              |
| MoP/ufMoS <sub>2</sub> @NC -2   | 0.143                                                                                        | 1                                                          | 1           | 2                  | -              |
| MoP/ufMoS <sub>2</sub> @NC-4    | 0.143                                                                                        | 1                                                          | 1           | 4                  | -              |
| MoP/MoS <sub>2</sub>            | 0.143                                                                                        | 1                                                          | 0           | 1.5                | -              |
| NC                              | -                                                                                            | -                                                          | 1           | -                  | 1.5            |
| MoP/ufMoS <sub>2</sub> @NC -phy | 0.143                                                                                        | 1                                                          | 1           | 1.5                | -              |

**Table S2.** Local structure parameters around Mo estimated by EXAFS analysis

|                            | Shell | N <sup>a</sup> | R (Å) <sup>b</sup> | σ <sup>2</sup> (Å <sup>2</sup> ·10 <sup>-3</sup> ) <sup>c</sup> | ΔE <sub>0</sub> (eV) <sup>d</sup> | R factor (%) |
|----------------------------|-------|----------------|--------------------|-----------------------------------------------------------------|-----------------------------------|--------------|
| Bulk MoP                   | Mo-P  | 6.1            | 2.45               | 3.5                                                             | 2.8                               | 0.2          |
|                            | Mo-Mo | 8.0            | 3.21               | 4.1                                                             | 1.7                               |              |
| MoP@NC                     | Mo-P  | 5.2            | 2.45               | 4.0                                                             | 3.0                               | 0.2          |
|                            | Mo-Mo | 5.4            | 3.21               | 4.5                                                             | 1.9                               |              |
| MoP/ufMoS <sub>2</sub> @NC | Mo-P  | 4.8            | 2.45               | 4.5                                                             | 2.4                               | 0.3          |
|                            | Mo-Mo | 4.5            | 3.21               | 4.7                                                             | 1.3                               |              |
| Bulk MoS <sub>2</sub>      | Mo-S  | 4.2            | 2.42               | 3.6                                                             | 1.2                               | 0.7          |
|                            | Mo-Mo | 2.6            | 3.16               | 3.3                                                             | 1.4                               |              |

<sup>a</sup>N: coordination numbers; <sup>b</sup>R: bond distance; <sup>c</sup>σ<sup>2</sup>: Debye-Waller factors; <sup>d</sup>ΔE<sub>0</sub>: the inner potential correction. R factor: goodness of fit. S02 were set as 0.90/0.96 for Mo-P/Mo-Mo, which was obtained from the experimental EXAFS fit of reference MoP by fixing CN as the known crystallographic value and was fixed to all the samples.

**Table S3.** Electrochemical parameters for MoP/<sub>uf</sub>MoS<sub>2</sub>@NSPC NSs and other control samples.

| Samples                         | Catalysis condition                      | $\eta_{10}$<br>[mV vs. RHE] | Tafel slope [mV dec <sup>-1</sup> ] | $j_0$<br>[mA cm <sup>-2</sup> ] |
|---------------------------------|------------------------------------------|-----------------------------|-------------------------------------|---------------------------------|
| <b>MoP/MoS<sub>2</sub>@NSPC</b> | <b>0.5 M H<sub>2</sub>SO<sub>4</sub></b> | <b>120</b>                  | <b>71</b>                           | <b>0.240</b>                    |
|                                 | <b>1 M KOH</b>                           | <b>80</b>                   | <b>62</b>                           | <b>0.537</b>                    |
| MoP@NC                          | 0.5 M H <sub>2</sub> SO <sub>4</sub>     | 235                         | 80                                  | 0.017                           |
|                                 | 1 M KOH                                  | 230                         | 73                                  | 0.028                           |
| MoP                             | 0.5 M H <sub>2</sub> SO <sub>4</sub>     | 350                         | 107                                 | 0.016                           |
|                                 | 1 M KOH                                  | 280                         | 109                                 | 0.032                           |
| MoS <sub>2</sub>                | 0.5 M H <sub>2</sub> SO <sub>4</sub>     | 500                         | 154                                 | 0.007                           |
|                                 | 1 M KOH                                  | 320                         | 168                                 | 0.102                           |
| Pt/C (20%)                      | 0.5 M H <sub>2</sub> SO <sub>4</sub>     | 42                          | 32                                  | 0.251                           |
|                                 | 1 M KOH                                  | 45                          | 53                                  | 1.272                           |

**Table S4.** Comparison of HER performance in acid and alkaline solutions for MoP/<sub>uf</sub>MoS<sub>2</sub>@NC and other MoP-based electrocatalysts.

| Catalyst                                   | Working electrode  | Catalysis condition                  | Loading amount [mg cm <sup>-2</sup> ] | $\eta_{10}$ [mV vs. RHE] | $j_0$ [mA cm <sup>-2</sup> ] | Tafel slope [mV dec <sup>-1</sup> ] | Ref.      |
|--------------------------------------------|--------------------|--------------------------------------|---------------------------------------|--------------------------|------------------------------|-------------------------------------|-----------|
| <b>MoP/<sub>uf</sub>MoS<sub>2</sub>@NC</b> | Glassy carbon      | 0.5 M H <sub>2</sub> SO <sub>4</sub> | 0.57                                  | 120                      | 0.240                        | 71                                  | This work |
|                                            |                    | 1 M KOH                              | 0.57                                  | 80                       | 0.537                        | 62                                  |           |
| <b>MoP NW/CC</b>                           | Carbon cloth       | 0.5 M H <sub>2</sub> SO <sub>4</sub> | 2                                     | 113                      | /                            | 53.3                                | [18]      |
|                                            |                    | 1 M KOH                              | 2                                     | 103                      | /                            | 65.6                                |           |
| <b>MoP/NC</b>                              | Glassy carbon      | 0.5 M H <sub>2</sub> SO <sub>4</sub> | 0.255                                 | 183                      | /                            | 56.9                                | [19]      |
|                                            |                    | 1 M KOH                              | 0.255                                 | 213                      | /                            | 61                                  |           |
| <b>MoP nanoparticles</b>                   | Glassy carbon      | 0.5 M H <sub>2</sub> SO <sub>4</sub> | 0.86                                  | 150                      | 0.034                        | 54                                  | [20]      |
|                                            |                    | 1 M KOH                              | 0.86                                  | 140                      | 0.046                        | 48                                  |           |
| <b>MoP@NCHSs-900</b>                       | Glassy carbon      | 0.5 M H <sub>2</sub> SO <sub>4</sub> | 0.4                                   | 92                       | 0.21                         | 62                                  | [10]      |
|                                            |                    | 1 M KOH                              | 0.4                                   |                          |                              |                                     |           |
| <b>Porous MoP Nano-Octahedrons</b>         | Glassy carbon      | 0.5 M H <sub>2</sub> SO <sub>4</sub> | 0.41                                  | 153                      | 0.21                         | 66                                  | [21]      |
|                                            |                    | 1 M KOH                              | 0.41                                  | 180                      | /                            | 78                                  |           |
| <b>MoP/CNT</b>                             | Carbon fiber paper | 0.5 M H <sub>2</sub> SO <sub>4</sub> | 0.5                                   | 83                       | 0.416                        | 60                                  | [22]      |
|                                            |                    | 1 M KOH                              | 0.5                                   | 86                       | 0.965                        | 73                                  |           |
| <b>MoP cluster</b>                         | Glassy carbon      | 0.5 M H <sub>2</sub> SO <sub>4</sub> | 0.337                                 | 119                      | 0.178                        | 58                                  | [23]      |
|                                            |                    | 1 M KOH                              | 0.337                                 | 140                      | 0.578                        | 72                                  |           |
| <b>MoP</b>                                 | Glassy carbon      | 0.5 M H <sub>2</sub> SO <sub>4</sub> | 0.071                                 | 246                      | 0.042                        | 60                                  | [24]      |
| <b>MoP microparticles</b>                  | Glassy carbon      | 0.5 M H <sub>2</sub> SO <sub>4</sub> | 0.1                                   | 150                      | 0.01                         | 50                                  | [25]      |
|                                            |                    | 1 M KOH                              | 0.1                                   | 190                      | /                            | /                                   |           |

|                                                            |                |                                           |      |     |        |      |      |
|------------------------------------------------------------|----------------|-------------------------------------------|------|-----|--------|------|------|
| <b>MoP-graphite nanomaterials</b>                          | Glassy carbon  | 0.5 M                                     | 2    | 115 | 0.18   | 65   | [26] |
|                                                            |                | H <sub>2</sub> SO <sub>4</sub><br>1 M KOH | 2    | 80  | /      | 59   |      |
| <b>MoP/graphene oxide</b>                                  | Glassy carbon  | 0.5 M                                     | 1.6  | 236 | /      | 111  | [27] |
|                                                            |                | H <sub>2</sub> SO <sub>4</sub><br>1 M KOH | 1.6  | 162 | 0.187  | 57   |      |
| <b>Closely interconnected network of MoP nanoparticles</b> | Glassy carbon  | 0.5 M                                     | 0.36 | 125 | 0.086  | 54   | [28] |
|                                                            |                | H <sub>2</sub> SO <sub>4</sub><br>1 M KOH | /    | /   | /      | /    |      |
| <b>MoS<sub>2</sub>@MoP</b>                                 | Glassy carbon  | 0.5 M                                     | 0.35 | 108 | /      | 76   | [29] |
|                                                            |                | H <sub>2</sub> SO <sub>4</sub><br>1 M KOH | 0.35 | 119 | /      | 85   |      |
| <b>MoS<sub>2</sub>-MoP/FPC-3</b>                           | Glassy carbon  | 0.5 M                                     | /    | 144 | /      | 41   | [30] |
|                                                            |                | H <sub>2</sub> SO <sub>4</sub><br>1 M KOH | /    | /   | /      | /    |      |
| <b>MoS<sub>2</sub>(1-x)P<sub>x</sub> Solid Solution</b>    | Glassy carbon  | 0.5 M                                     | 0.29 | 150 | /      | 50   | [31] |
|                                                            |                | H <sub>2</sub> SO <sub>4</sub><br>1 M KOH | /    | /   | /      | /    |      |
| <b>MoP<sub>2</sub> NPs/Mo</b>                              | Metal Mo plate | 0.5 M                                     | /    | 143 | 0.06   | 57   | [32] |
|                                                            |                | H <sub>2</sub> SO <sub>4</sub><br>1 M KOH | /    | 194 | /      | 80   |      |
| <b>N@MoPC<sub>x</sub> nanosheet</b>                        | Glassy carbon  | 0.5 M                                     | 0.14 | 108 | 0.3424 | 69.4 | [33] |
|                                                            |                | H <sub>2</sub> SO <sub>4</sub><br>1 M KOH | 0.14 | 139 | 0.3023 | 86.6 |      |
| <b>MoP-G-60-11</b>                                         | Glassy carbon  |                                           | 0.64 | 277 | 0.064  | 63   | [34] |

### Supplementary references:

- [1] B. Ravel, M. Newville, *J Synchrotron Radiat* **2005**, *12*, 537-541.
- [2] D. C. Koningsberger, R. Prins, **1987**.
- [3] J. J. Rehr, R. C. Albers, *Rev. Mod. Phys.* **2000**, *72*, 621.
- [4] a) G. Kresse, J. Furthmüller, *Phys. Rev. B* **1996**, *54*, 11169; b) G. Kresse, J. Furthmüller, *Comput. Mater. Sci.* **1996**, *6*, 15-50.
- [5] G. Kresse, D. Joubert, *Phys. Rev. B* **1999**, *59*, 1758.
- [6] J. P. Perdew, K. Burke, E. M., *Phys. Rev. Lett.* **1996**, *77*, 3765.
- [7] S. Grimme, J. Antony, S. Ehrlich, H. Krieg, *J. Chem. Phys.* **2010**, *132*, 154104.
- [8] W. Setyawan, S. Curtarolo, *Comput. Mater. Sci.* **2010**, *49*, 299-312.

- [9] V. Wang, N. Xu, J.-C. Liu, G. Tang, W.-T. Geng, *Comput. Phys. Commun.* **2021**, 267.
- [10] D. Zhao, K. Sun, W. C. Cheong, L. Zheng, C. Zhang, S. Liu, X. Cao, K. Wu, Y. Pan, Z. Zhuang, B. Hu, D. Wang, Q. Peng, C. Chen, Y. Li, *Angew. Chem. Int. Ed. Engl.* **2020**, 59, 8982-8990.
- [11] T. J. M. M. H. V. Huynh, *Chem. Rev.* **2007**, 107, 5004–5064.
- [12] a) J. K. Norskov, F. Abild-Pedersen, F. Studt, T. Bligaard, *PNAS* **2011**, 108, 937-943; b) S. J. Hwang, S. K. Kim, J. G. Lee, S. C. Lee, J. H. Jang, P. Kim, T. H. Lim, Y. E. Sung, S. J. Yoo, *J. Am. Chem. Soc.* **2012**, 134, 19508-19511.
- [13] K. Momma, F. Izumi, *J. Appl. Crystallogr.* **2008**, 41, 653-658.
- [14] X. Zheng, J. Xu, K. Yan, H. Wang, Z. Wang, S. Yang, *Chem. Mater.* **2014**, 26, 2344-2353.
- [15] Y. Ito, W. Cong, T. Fujita, Z. Tang, M. Chen, *Angew. Chem. Int. Ed.* **2015**, 54, 2131-2136.
- [16] H. Yan, C. Tian, L. Wang, A. Wu, M. Meng, L. Zhao, H. Fu, *Angew. Chem. Int. Ed.* **2015**, 54, 6325-6329.
- [17] J. Duan, S. Chen, B. A. Chambers, G. G. Andersson, S. Z. Qiao, *Adv. Mater.* **2015**, 27, 4234-4241.
- [18] Y. Teng, X. D. Wang, H. Y. Chen, J. F. Liao, W. G. Li, D. B. Kuang, *J. Mater. Chem. A* **2017**, 5, 22790–22796.
- [19] M. Lin, R. Lu, W. Luo, N. Xu, Y. Zhao, L. Mai, *ACS Applied Energy Materials* **2021**, 4, 5486-5492.
- [20] P. Xiao, M. Alam Sk, L. Thia, X. M. Ge, R. J. Lim, J. Y. Wang, K. H. Lim, X. Wang, *Energy Environ. Sci.* **2014**, 7, 2624-2629.
- [21] J. Yang, F. Zhang, X. Wang, D. He, G. Wu, Q. Yang, X. Hong, Y. Wu, Y. Li, *Angew. Chem. Int. Ed.* **2016**, 55, 12854-12858.

- [22] X. Zhang, X. Yu, L. Zhang, F. Zhou, Y. Liang, R. Wang, *Adv. Funct. Mater.* **2018**, 1706523.
- [23] H. Yan, Y. Jiao, A. Wu, C. Tian, X. Zhang, L. Wang, Z. Ren, H. Fu, *Chem. Commun.* **2016**, 52, 9530-9533.
- [24] X. Chen, D. Wang, Z. Wang, P. Zhou, Z. Wu, F. Jiang, *Chem. Commun.* **2014**, 50, 11683-11685.
- [25] T. Y. Wang, K. Z. Du, W. L. Liu, Z. W. Zhu, Y. H. Shao, M. X. Li, *J. Mater. Chem. A* **2015**, 3, 4368–4373.
- [26] Z. Pu, I. S. Amiin, X. Liu, M. Wang, S. Mu, *Nanoscale* **2016**, 8, 17256-17261.
- [27] K. Ojha, M. Sharma, H. Kolev, A. K. Ganguli, *Catal. Sci. Technol.* **2017**, 7, 668-676.
- [28] Z. Xing, Q. Liu, A. M. Asiri, X. Sun, *Adv. Mater.* **2014**, 26, 5702-5707.
- [29] A. Wu, C. Tian, H. Yan, Y. Jiao, Q. Yan, G. Yang, H. Fu, *Nanoscale* **2016**, 8, 11052-11059.
- [30] Q. Zhou, J. Feng, X. Peng, L. Zhong, R. Sun, *Journal of Energy Chemistry* **2020**, 45, 45-51.
- [31] R. Ye, P. del Angel-Vicente, Y. Liu, M. J. Arellano-Jimenez, Z. Peng, T. Wang, Y. Li, B. I. Yakobson, S. H. Wei, M. J. Yacaman, *Adv. Mater.* **2015**.
- [32] Z. Pu, I. Saana Amiin, M. Wang, Y. Yang, S. Mu, *Nanoscale* **2016**, 8, 8500-8504.
- [33] Y. Huang, J. X. Ge, J. Hu, J. W. Zhang, J. Hao, Y. G. Wei, *Adv. Energy Mater.* **2018**, 8, 1701601.
- [34] S. J. Aravind, K. Ramanujachary, A. Mugweru, T. D. Vaden, *Applied Catalysis A: General* **2015**, 490, 101-107.
